# Supplementary material for: A new type of entangled coordination network: coexistence of polythreading and polyknotting involved molecular braids
Source: Royal Society of Chemistry journal article supplement (doi:10.1039/c2cc17821d), 2012-01-01
Supplement: c2cc17821d.pdf [file c2cc17821d.pdf]

## Supporting Information

### A new type of entangled coordination network: coexistence of polythreading and polyknotting involved molecular braids

Zhi-Guo Gu<sup>a, b\*</sup>, Xin-Xin Xu,<sup>a</sup> Wen Zhou,<sup>a</sup> Chun-Yan Pang,<sup>a</sup> Fei-Fei Bao<sup>a</sup> and Zaijun Li<sup>a</sup>

<sup>a</sup> School of Chemical and Material Engineering, Jiangnan University, Wuxi 214122, P. R. China

<sup>b</sup> Coordination Chemistry Institute and the State Key Laboratory of Coordination Chemistry, School of Chemistry and Chemical Engineering, Nanjing University, Nanjing 210093, P. R. China

### Experimental section

#### Materials and physical measurements

5-(4-Carboxy-2-nitrophenoxy)isophthalic acid (H<sub>3</sub>L) (98%) was purchased from Aldrich. All other chemicals were of reagent grade quality obtained from commercial sources and used without further purification.

Infrared spectra were collected over the range 650–4000 cm<sup>-1</sup> using a SensIR IlluminatIR spectrometer with a diamond ATR fitted to an Olympus microscope. The spectrum is the average of 128 scans. Elemental analyses for C, H and N were performed on a Perkin-Elmer 240C analyzer. X-ray Powder Diffraction (XRPD) was carried out with a Scintag XDS 2000 powder diffractometer using Cu K $\alpha$  radiation ( $\lambda$  = 1.5418 Å), solid state detector, scan range of 5° to 50° (2 $\theta$ ), step size 0.05° and scan rate 5.0°/min. All samples were ground thoroughly in a mortar and pestle prior to mounting the resultant powder in the XRPD sample holder. Thermogravimetric studies were carried out on a high-resolution Auto TGA 2950 analyzer ( $T_{\text{max}}$  = 550 °C, heating rate = 5 °C/s).

#### Synthesis of [Co(HL)(H<sub>2</sub>O)<sub>4</sub>]<sub>n</sub>[Co<sub>3</sub>(L)<sub>2</sub>(H<sub>2</sub>O)<sub>10</sub>]<sub>n</sub>·4nH<sub>2</sub>O (1)

A mixture of CoCl<sub>2</sub>·6H<sub>2</sub>O (357 mg, 1.50 mmol), H<sub>3</sub>L (173 mg, 0.5 mmol),

---

\* Corresponding author: tel.: +86 510 85917090; fax: +86 510 85917763.  
E-mail: zhiguogu@jiangnan.edu.cn.

triethylamine (152 mg, 1.5 mmol), and 6 mL of H<sub>2</sub>O was stirred in air for 0.5 h (final pH ~ 8.1). The resulting solution was heated in a stainless steel reactor with Teflon liner at 100 °C for 2 days. After a period of approximately 24 h cooling to room temperature, a orange brown solution appeared (pH ~ 6.2), which was filtered and left to stand at room temperature. Red plate-shaped crystals of **1** suitable for X-ray diffraction were obtained by slow evaporation of the solvents within one week. Yield: 40%. Anal Calcd for C<sub>90</sub>H<sub>109</sub>Co<sub>8</sub>N<sub>6</sub>O<sub>90</sub>: C, 33.93; H, 3.45; N, 2.64. Found: C, 33.81; H, 3.58; N, 2.52.

### X-ray structure determination

Data sets were collected on a Bruker APEX-II diffractometer with a CCD area detector at 100 K with Mo K $\alpha$  radiation ( $\lambda$  = 0.71073 Å). Cell parameters were retrieved using SMART software and refined using SAINT<sup>1</sup> on all observed reflections. Data was collected using a narrow-frame method with scan widths of 0.30° in  $\omega$  and an exposure time of 10s/frame. The highly redundant data sets were reduced using SAINT<sup>1</sup> and corrected for Lorentz and polarization effects. Absorption corrections were applied using SADABS<sup>2</sup> supplied by Bruker. Structures were solved by direct methods using the program SHELXS-97.<sup>3</sup> The positions of metal atoms and their first coordination spheres were located from direct-methods *E*-maps; other non-hydrogen atoms were found in alternating difference Fourier syntheses and least-squares refinement cycles and, during the final cycles, refined anisotropically. Hydrogen atoms were placed in calculated position and refined as riding atoms with a uniform value of  $U_{\text{iso}}$ .

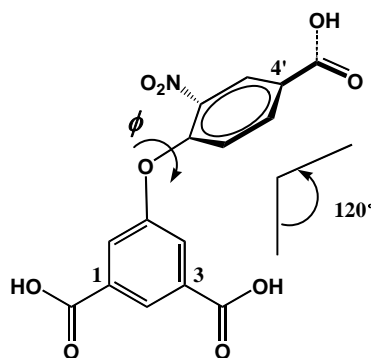

**Scheme S1.** Structure of H<sub>3</sub>L ligand.

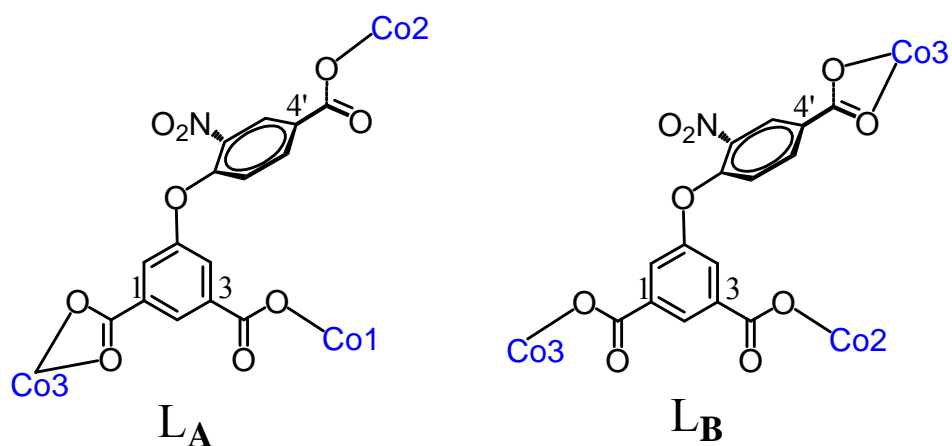

**Scheme S2.** Schematic representation of the coordination mode of 5-(4-Carboxy-2-nitrophenoxy)isophthalic acid in the 2D  $[\text{Co}_3(\text{L})_2(\text{H}_2\text{O})_{10}]_n$  motif.

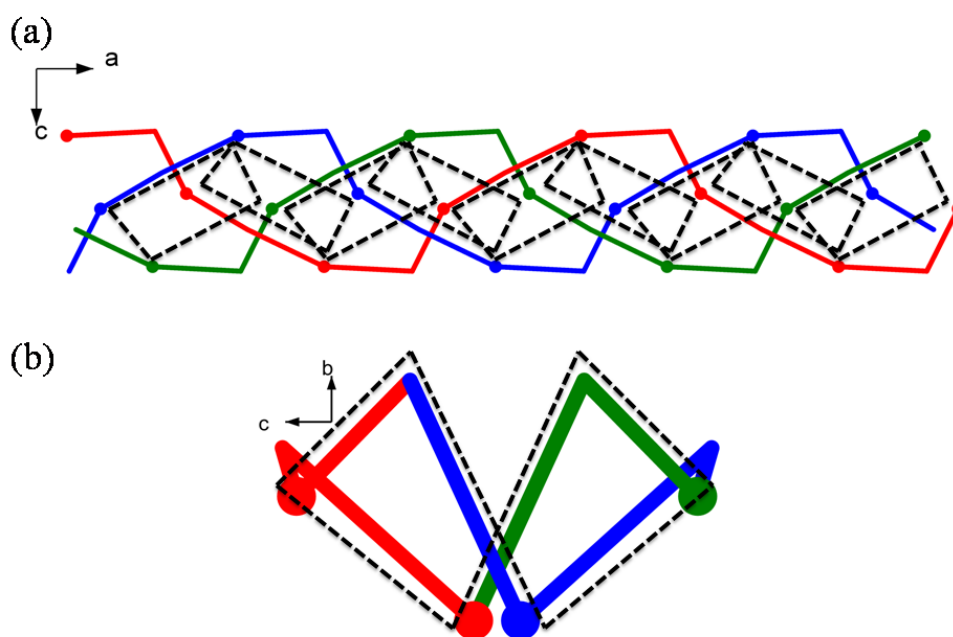

**Fig. S1** (a) View of the topology of the triple-stranded braid along the helical axis. The dashed represent the pseudo four-membered loops. (b) View of the topology of the triple-stranded braid down the helical axis. The dashed represent the vertex-sharing two pseudo-quadrangles.

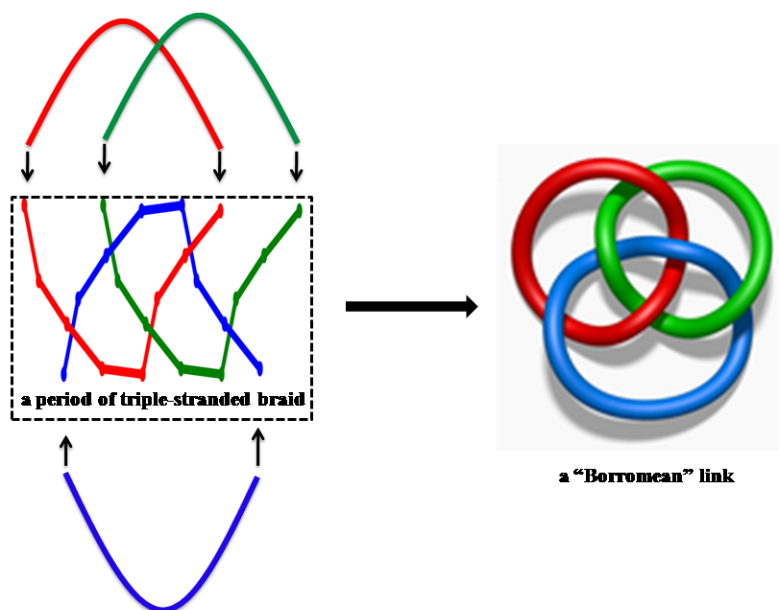

**Fig. S2** Schematic view of the relationship between triple-stranded braid and “Borromean” link.

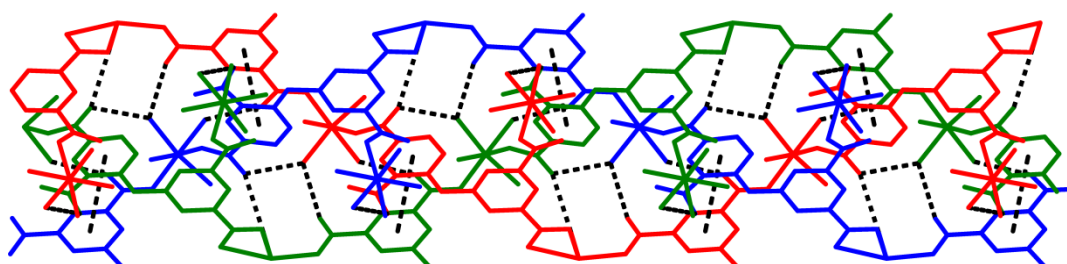

**Fig. S3** Self-assembly of the triple-stranded braid through formation of  $\pi$ - $\pi$  stacking interactions (interplanar distance of 3.68 Å) and hydrogen bonds (O10W-H10X $\cdots$ O9<sup>#6</sup> 2.686(4) Å, O6W-H6Y $\cdots$ O11<sup>#1</sup> 2.702(4) Å, O7W-H7X $\cdots$ O12<sup>#1</sup> 2.706(4) Å, O7W-H7Y $\cdots$ O9<sup>#5</sup> 2.732(4) Å, O4W-H4X $\cdots$ O6<sup>#1</sup> 2.867 (4) Å; #1  $x + 1/2, y, -z + 1/2$ , #5  $x - 1/2, y, -z + 1/2$ , #6  $x - 1/2, -y + 1/2, -z$ ).

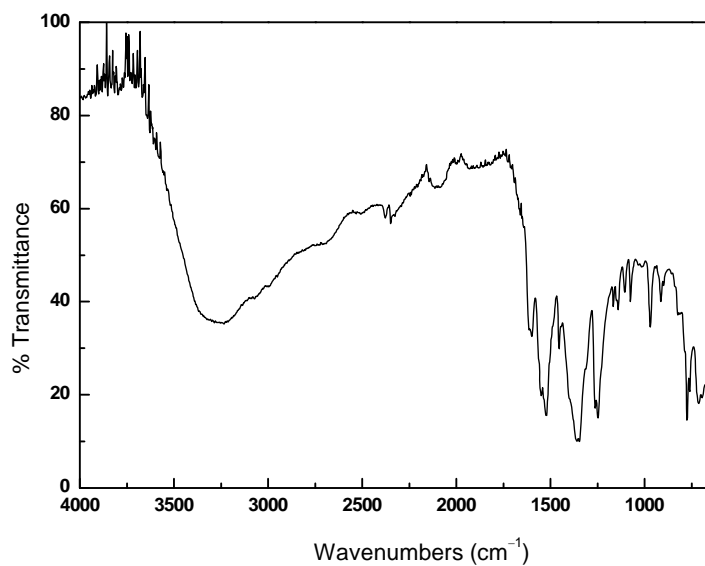

**Fig. S4** FT-IR spectroscopy for as-synthesized sample of **1**. (3233 (br), 1602 (m), 1521 (s), 1454 (w), 1346 (s), 1247 (s), 1141 (m), 1106 (w), 1075 (m), 970 (m), 914 (w), 776 (s), 712 (s))

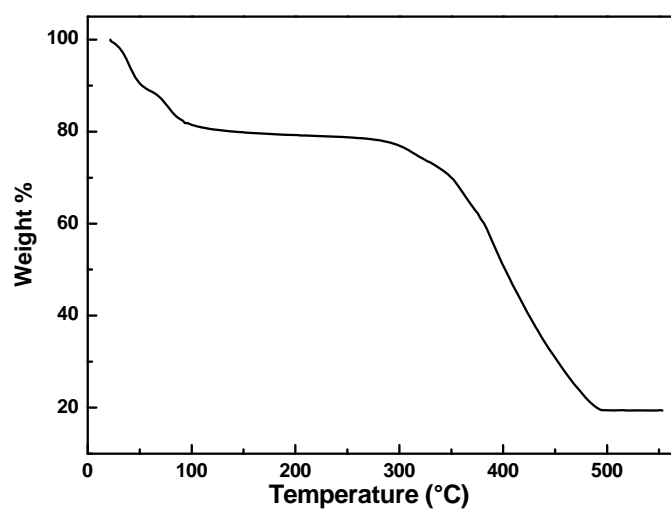

**Fig. S5** Thermogravimetric analysis for as-synthesized sample of **1**. The first weight loss until 120 °C was due to the coordinated and uncoordinated water molecules (obsd. 19.52%, calcd 20.35%). The decomposition of the organic links in the anhydrous compound occurs at 280 to 500 °C. The remaining weight corresponds to the formation of  $\text{Co}_2\text{O}_3$  (obsd 19.43%, calcd 20.82%).

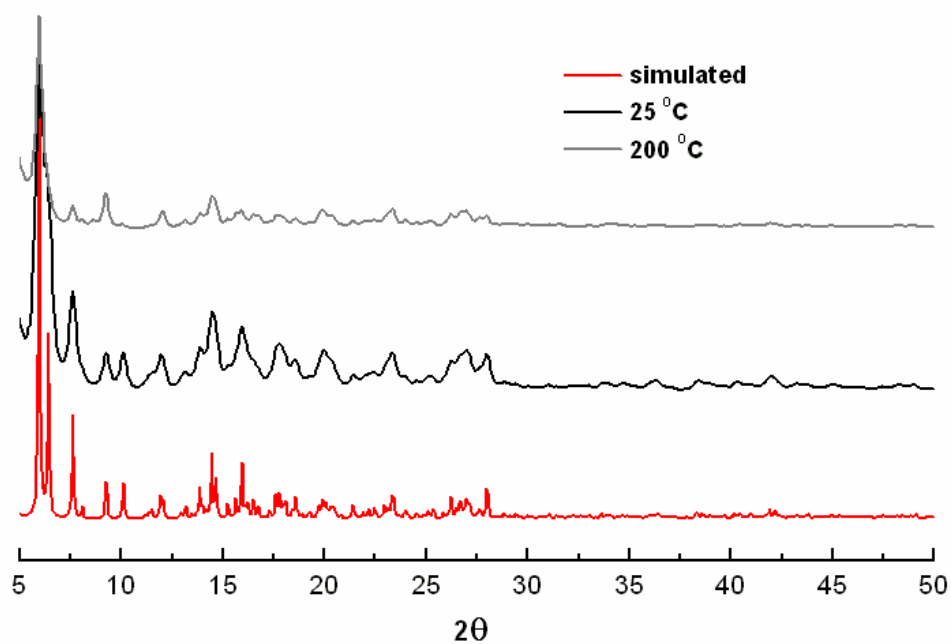

**Fig. S6** The variable temperature XRPD patterns for **1**.

- 1 *SAINT-Plus*, version 6.02; Bruker Analytical X-ray System: Madison, WI, 1999.
- 2 G. M. Sheldrick, *SADABS: An Empirical Absorption Correction Program*; Bruker Analytical X-ray Systems: Madison, WI, 1996.
- 3 G. M. Sheldrick, *SHELXTL-97*; Universität of Göttingen: Göttingen, Germany, 1997.
